# Anesthesiology: From Patient Safety to Population Outcomes

## The 49th Annual Rovenstine Lecture

Kevin K. Tremper, Ph.D., M.D.\*

**O**CTOBER 16, 1846, marked a dramatic day in the history of humankind, with the first public demonstration of anesthesia (fig. 1A).<sup>1</sup> If the reduction of human suffering is medicine's primary goal, it could be argued that anesthesiology has contributed more to humankind than any other field of medicine. In its first issue in 2000, the editors of *The New England Journal of Medicine* published an editorial on a millennium in medicine, in which they presented the 11 most important advances in medicine in the past 1,000 years.<sup>2</sup> Anesthesiology was, of course, on the list. However, because information was published in chronological order, anesthesiology did not appear first, its rightful position of importance in my opinion. Although none of us can take credit for this advance, we can clearly be proud of our heritage and what we do every day in reducing pain and suffering for millions of people.

During the past 164 yr, the field of anesthesiology has rapidly progressed, with many developments that have improved the quality and safety of anesthesia care and enabled tremendous advances in the surgical disciplines. During this lecture, I will focus on two "points of inflection" in the field of which I am familiar: the development of noninvasive monitoring of oxygenation (and monitoring standards, in general) and the development of perioperative anesthesia information management systems (AIMS). I believe many of the older members of this audience will agree that there was a significant change in the practice of anesthesiology between 1980 and 1990. I hope to convince you that we are in the midst of another change that will dramatically affect the way we practice in the next decade as we

\*Robert B. Sweet Professor and Chair, Department of Anesthesiology, University of Michigan Health System, Ann Arbor, Michigan.

Received from the University of Michigan Health System, Ann Arbor, Michigan. Submitted for publication August 25, 2010. Accepted for publication November 4, 2010. Support was provided solely from institutional and/or departmental sources. The University of Michigan has been the development site for the General Electric Anesthesiology Information Management System (Centricity) since 1998. The University of Michigan has a royalty agreement for some of the work performed on this system. I have software patents filed (through the University of Michigan) regarding display technology.

Address correspondence to Dr. Tremper: Department of Anesthesiology, University of Michigan Health System, 1500 E Medical Center Dr, Ann Arbor, Michigan 48109. ktremper@umich.edu. This article may be accessed for personal use at no charge through the Journal Web site, [www.anesthesiology.org](http://www.anesthesiology.org).

Copyright © 2011, the American Society of Anesthesiologists, Inc. Lippincott Williams & Wilkins. Anesthesiology 2011; 114: 755–70

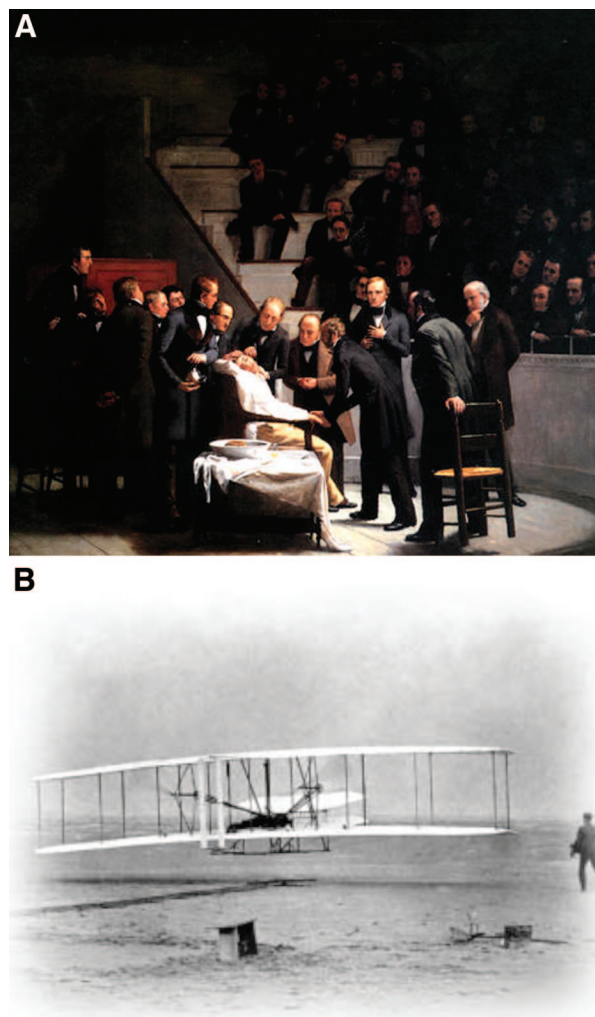

**Fig. 1.** (A) The first public demonstration of ether anesthesia was on October 16, 1846. W. T. G. Morton, M.D., is depicted, holding the ether, whereas J. C. Warren, M.D., performed the operation. This painting is by Robert C. Hinckley (1853–1941), used with permission by Boston Medical Library in the Francis A. Countway Library of Medicine. (B) The Wright brothers first flight on December 17, 1903, at Kitty Hawk, North Carolina. The picture is public domain ([http://www.wpclipart.com/world\\_history/the\\_hand\\_of\\_man/wright\\_brothers\\_first\\_flight](http://www.wpclipart.com/world_history/the_hand_of_man/wright_brothers_first_flight); Accessed November 10, 2010).

**MA** Presented at the American Society of Anesthesiologists Annual Meeting, San Diego, California, October 18, 2010.

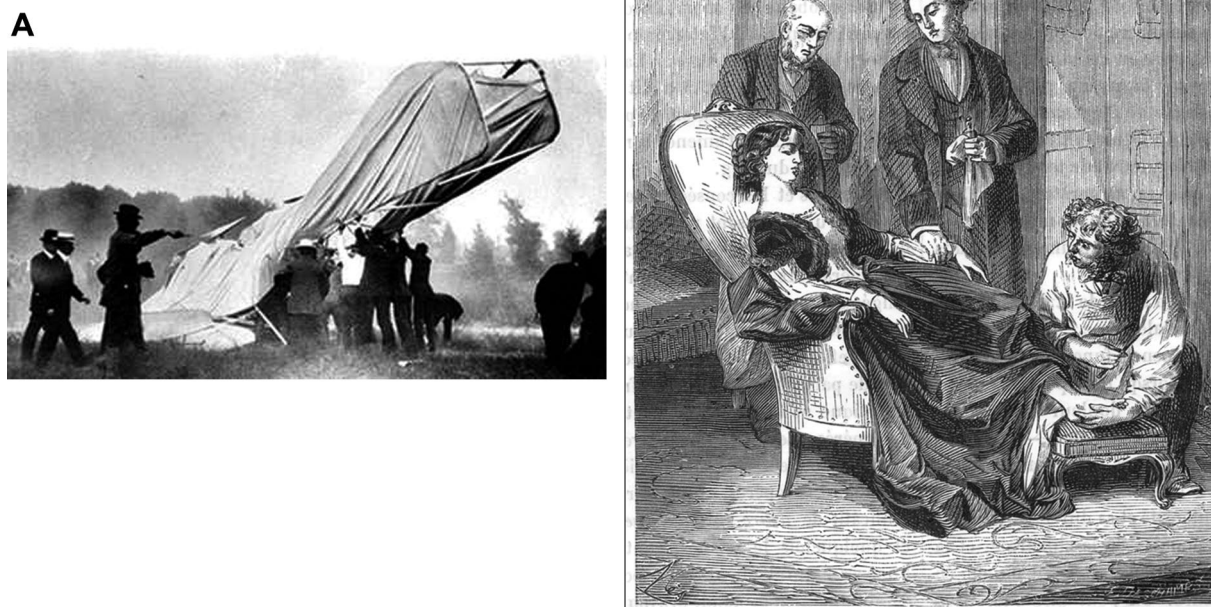

**Fig. 2.** (A) The wreckage associated with the first known aviation mortality. Orville Wright took LT Thomas Selfridge on a trial flight, as part of the US military consideration for a contract for purchasing aircraft. With more than 2,000 attendants watching the flight, Selfridge took off with O. Wright. Shortly after their ascent, their propeller cracked and broke, resulting in the aircraft coming to the ground, seriously injuring O. Wright and fatally injuring Selfridge. Interestingly, the crash was in a field neighboring Arlington National Cemetery, where Selfridge was buried. The picture is from The Official Website of the Air Force Historical Research Agency and is public domain.<sup>3</sup> (B) Depiction of the first anesthetic death as the result of chloroform. The patient was aged 15 yr and was about to undergo the removal of a great toenail. She had undergone a similar procedure on the other foot 1 month previously. The anesthetic was administered by Thomas N. Meggison, M.D., and the procedure was performed by his assistant, Mr. Lloyd. The anesthetic was administered by pouring a teaspoon of chloroform on a handkerchief that was placed on the patient's face. Shortly after the procedure began, the patient coughed and moved, which caused Meggison to place more anesthetic on the patient's mouth. Shortly afterward, the patient's color changed and the operation was discontinued; then, resuscitation began. The resuscitation consisted of water on the face, followed by brandy, neither of which revived the patient. She was then laid on the floor, and the veins in her arms and jugular were opened, but no blood flowed. According to Meggison, "the whole process of inhalation operation of this section and death could not, I should say, have occupied more than 2 min." Permission to use the photograph was given by the Mary Evans Picture Library, London, England (available at: <http://www.prints-online.com>; picture No. 10110132).<sup>4</sup>

first implement information systems as a routine and then use the data derived from those systems to make another dramatic change in the way medicine is practiced, not only in our field but in other disciplines.

As I review the progress of anesthesiology for greater than the past 150 yr, I see striking similarities in the progress of the aviation industry. This may make even more sense for me. Having a father who was a test pilot and having soloed my first plane at the age of 17 years, I felt a remarkable déjà vu "soloing" my first anesthetic. What do we actually do to patients? (1) We suspend consciousness. (2) We counterbalance painful stimuli. (3) We maintain normal physiology during a planned trauma. (4) We frequently produce nausea and vomiting. We are a lot like pilots. Both of us have a fun job taking people places. We place people in a dangerous

situation. We try to make people feel at ease and allay their fears. We really do not provide complete information for consent. If we were to inform the patient of what we actually plan to do to him or her, we would have to tell the patient the following. We will give you a drug that will cause you to stop breathing, and your oxygen concentration will start to decrease. In case you attempt to breathe, we prevent even the slightest possibility of that occurring by giving you a second drug that paralyzes your muscles. Then, during the next critical few minutes, we manage to control your airway and place you "safely" on a ventilator. This is similar to what a pilot would have to say to passengers before starting down the runway. Before the plane takes off, the pilots do not state that the liftoff speed is 180 mph and that if that speed is not reached half-way down the runway the plane will end up in a



pile of flames and most likely all will perish. The pilot should also state that during the first few minutes of maximum thrust, if for some reason the plane should lose power, again it will fall to the earth in a pile of flames and most likely all will perish. This type of informed consent, as with detailed information regarding anesthesia, would not help the passengers (or patients) undergo their “flight” at ease. Therefore, neither pilots nor anesthesiologists inform their patients nor passengers with accurate details of what is about to happen. A formal informed consent does not seem necessary because everyone has a general understanding that being up in the air is not safe and could potentially be lethal. The same could be said regarding anesthesia but in a more vague way (*i.e.*, most patients know that anesthesia is an abnormal state with inherent danger, but the alternative seems much worse).

Next, both anesthesiologists and pilots have a flight plan A and plans B and C, should the unforeseen occur. Again, most of the risk is during the takeoff and the landing (*i.e.*, the induction and emergence); during the flight, both of us look at electronic devices to see where we are. Finally, we both tend to make some people experience nausea and vomiting.

As with pilots, anesthesiologists have short and long flights, with long ones requiring more planning and preparation. We may be flying young “healthy” planes, or we may be flying elderly planes with more “comorbidities.” We may need to fly under extreme conditions. The advances in anesthesiology in improving safety have given us the ability to care for more elderly patients undergoing more complex surgical procedures.

On December 17, 1903, the Wright brothers (Orville and Wilbur Wright, Dayton, Ohio) made history by flying the first heavier-than-air aircraft (fig. 1B). Approximately 4 yr later, on September 7, 1908, LT Thomas Selfridge climbed aboard an early Wright brothers aircraft with Orville Wright for a test flight as part of an evaluation for a military contract. Several minutes into the flight, a propeller broke and fell to the ground, and the plane soon followed, seriously injuring Orville Wright and making the 26-yr-old lieutenant the first aviation fatality (fig. 2A).<sup>3</sup> Although this disaster devastated the Wright brothers, there was a thorough investigation by the military that absolved Orville Wright of any blame, noting the crash was the result of a mechanical failure. Ultimately, Orville Wright was awarded the first military contract for \$30,000 to further develop a military aircraft.

Similarly, 2 yr after the demonstration of ether anesthesia in Boston, Massachusetts, a 15-yr-old girl named Hannah Greener (who died on January 28, 1848) underwent chloroform anesthesia for the removal of a toenail. According to Thomas Nathaniel Meggison, M.D., who administered the chloroform, the girl did not take the anesthetic well. She died despite all resuscitative efforts, including “dashed water in her face,” “gave her some brandy,” and “opened veins in her arm and jugular” (fig. 2B).<sup>4</sup> Unfortunately, as anesthesia became more popular and expanded throughout the world,

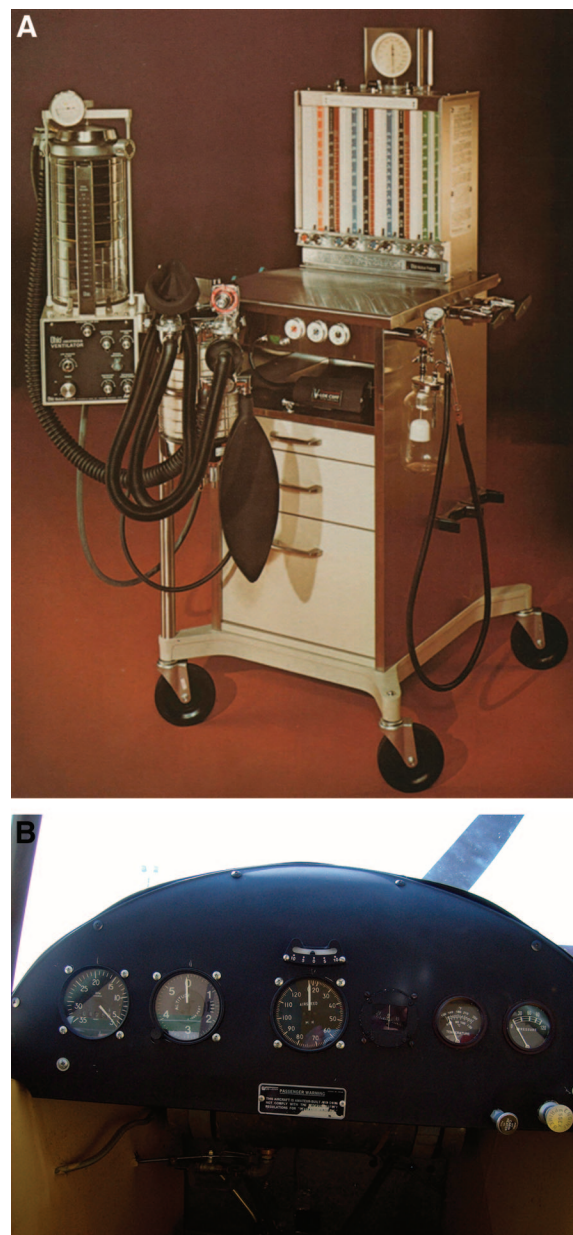

**Fig. 3.** (A) This is an Ohio Medical Products DM5000 anesthesia machine, circa 1960s, in which the monitoring consisted of a manual blood pressure cuff with respirations and heart beat monitored by auscultation. During the late 1970s, electrocardiography with optical plethysmography was added. Picture available online (Anesthesia Course Notes Site, Michael Dosch, CRNA University of Detroit Mercy, <http://www.udmercy.edu/crna/agm/cns.htm>; Accessed November 10, 2010). (B) This is the cockpit of a J3 Cub aircraft, built in the 1940s. It had minimal gauges, presenting altitude and air speed. There is no radio, and navigation was by visual flight rules. The visual flight rule era of aviation was similar to anesthesia monitoring before the 1970s. Most of the monitoring was by clinical skills, observation, palpation, and osculation. Photograph from Wikimedia Commons, free media repository, posted August 18, 2007 (Nyttend; [http://commons.wikimedia.org/wiki/File:Piper\\_Cub\\_cockpit.jpg](http://commons.wikimedia.org/wiki/File:Piper_Cub_cockpit.jpg)).

there continued to be significant mortalities. The first intravenous anesthetic, thiopental, was associated with problems when it was first made available in a 5% concentration.<sup>5</sup> The first major study<sup>6</sup> of anesthetic mortality noted that anesthesia was associated with a mortality of 1 in 1,560 individuals and was estimated to cause more deaths than polio during the height of the epidemic. Ironically, 50 yr later, in an Institute of Medicine report,<sup>7</sup> anesthesiology was highlighted as a leader in patient safety and recognized for notably reducing errors by using a “combination of technological advances and standardized equipment.” This reduced anesthesia-associated mortality to approximately 1 in 200,000 individuals.

How did this dramatic improvement in anesthesia safety occur? It was probably started with the efforts of Harvey Cushing, M.D. (a neurosurgeon born in Cleveland, Ohio, in 1869), considered by many as the father of neurosurgery, with his use of an anesthetic record to document pulse and respiration and, later, blood pressure.<sup>8</sup> For the first time, this allowed tracking of the physiologic course of anesthetic care. During the next 80 yr, anesthesia machines were developed and incorporated vaporizers, gas flow meters, ventilators, and carbon dioxide absorbers. However, the monitoring remained relatively unchanged, with the manual cuff, pulse rate, and auscultation of respirations (fig. 3A). This is what I would refer to as the visual flight rules era of anesthesia, equivalent to that of a 1930s aircraft; pilots were required to have exquisite “clinical skills” to assess the status of the aircraft and navigate simultaneously (fig. 3B). It was not until the early 1980s that the course of anesthesia changed with the nearly simultaneous availability of three monitoring devices: a noninvasive automatic blood pressure cuff, a capnometer, and a pulse oximeter.

### Pulse Oximetry

In this section, I will briefly review the fascinating history of the development of pulse oximetry; more than any other device, the pulse oximeter signifies the point of inflection in the history of anesthesia. It is a monitor that was developed and promoted by anesthesiologists but has been adopted by all those in acute-care medicine. As with many innovations, the development of pulse oximetry involved a host of individuals. Most would agree that the first functional oximeter was developed by Glenn Alan Millikan, Ph.D. (a physiologist working for the Johnson Research Foundation; University of Pennsylvania, Philadelphia, Pennsylvania) during World War II as part of a series of physiologic experiments to determine when aviators (another aviation connection) would require supplemental oxygen.<sup>9</sup> Millikan was the son of Robert A. Millikan, Ph.D. (1868–1953), the Nobel Prize-winning physicist and cofounder of the California Institute of Technology, Pasadena.<sup>10</sup> Per previous data, the color of living tissue could change with the desaturation of hemoglobin and the color change was measured by light absorption or reflection.

Millikan demonstrated that this change could be detected by shining light through the earlobe and measuring the change in the transmitted light intensity. Two modifications of the device were required to detect a signal related to arterial hemoglobin. Because light is absorbed by the blood and tissue in the ear, he had to zero the device by squashing the ear to eliminate blood and zero the light transmission to that of bloodless tissue. After the device was zeroed, he then released the pressure to allow blood to return to the ear, but this blood was a combination of arterial, venous, and capillary blood. To obtain a signal that was primarily arterial, he heated the device to 42°C to make the ear hyperemic and thereby arterialized the blood sensed by the oximeter. This device was successfully used in experiments during the next decade and was cited as a clinical monitoring device in *ANESTHESIOLOGY* in 1951 by Stephen *et al.*<sup>11</sup> Although the oximeter was useful in detecting desaturation that was undetectable clinically, this early device was difficult to maintain. If left in the same site, it would cause a burn. In 1974, a Japanese electrical engineer, Takuo Aoyagi, Ph.D. (Faculty of Engineering, Niigata University, Niigata Prefecture, Japan), made an insightful observation.<sup>12</sup> He was working on a technique to noninvasively estimate cardiac output by using a Millikan-type oximeter and intravenous dye. He detected this dye by placing a Millikan ear oximeter on his subjects and then attempted to measure a dye dilution curve as the intravenously injected dye perfused the ear, hoping that the ear blood flow could be related to the total cardiac output. During these experiments, he noted oscillations in the red and infrared signals of the ear oximeter. He came up with the ingenious idea that if he assumed that the pulsatile signal must be arterial blood, he could then derive a signal related to arterial hemoglobin saturation without first calibrating by compressing the ear and then heating the ear. Although he did not publish this as a pulse oximeter, it soon became known as the pulse oximeter because it analyzed the pulsatile light absorption signal in red and infrared light. This idea was soon adopted by Scott Wilber, B.E. (an engineer and founder of Biox Technology, Boulder, CO), and modified by using light-emitting diodes as light sources and photo diodes as light detectors, which allowed for a lightweight clip-on ear or finger probe.<sup>13</sup> The modern pulse oximeter was developed by an anesthesiologist, Bill New, M.D., Ph.D. (Engineer and Clinical Assistant Professor of Anesthesiology, Stanford University, Palo Alto, California).<sup>13</sup> He saw the tremendous application of the device in anesthesia and ingeniously decided to make the pulse beep tone change with saturation. With its easy-to-use sensor that needed no calibration to provide beat-to-beat arterial saturation and pulse, this generation of pulse oximeter was greeted with nearly instantaneous acceptance. The first publication documenting the accuracy of the pulse oximeter appeared in *ANESTHESIOLOGY* in 1984 by Yelderman and New.<sup>14</sup> It was only 2 yr later that the American Society of Anesthesiologists (ASA) published standards for



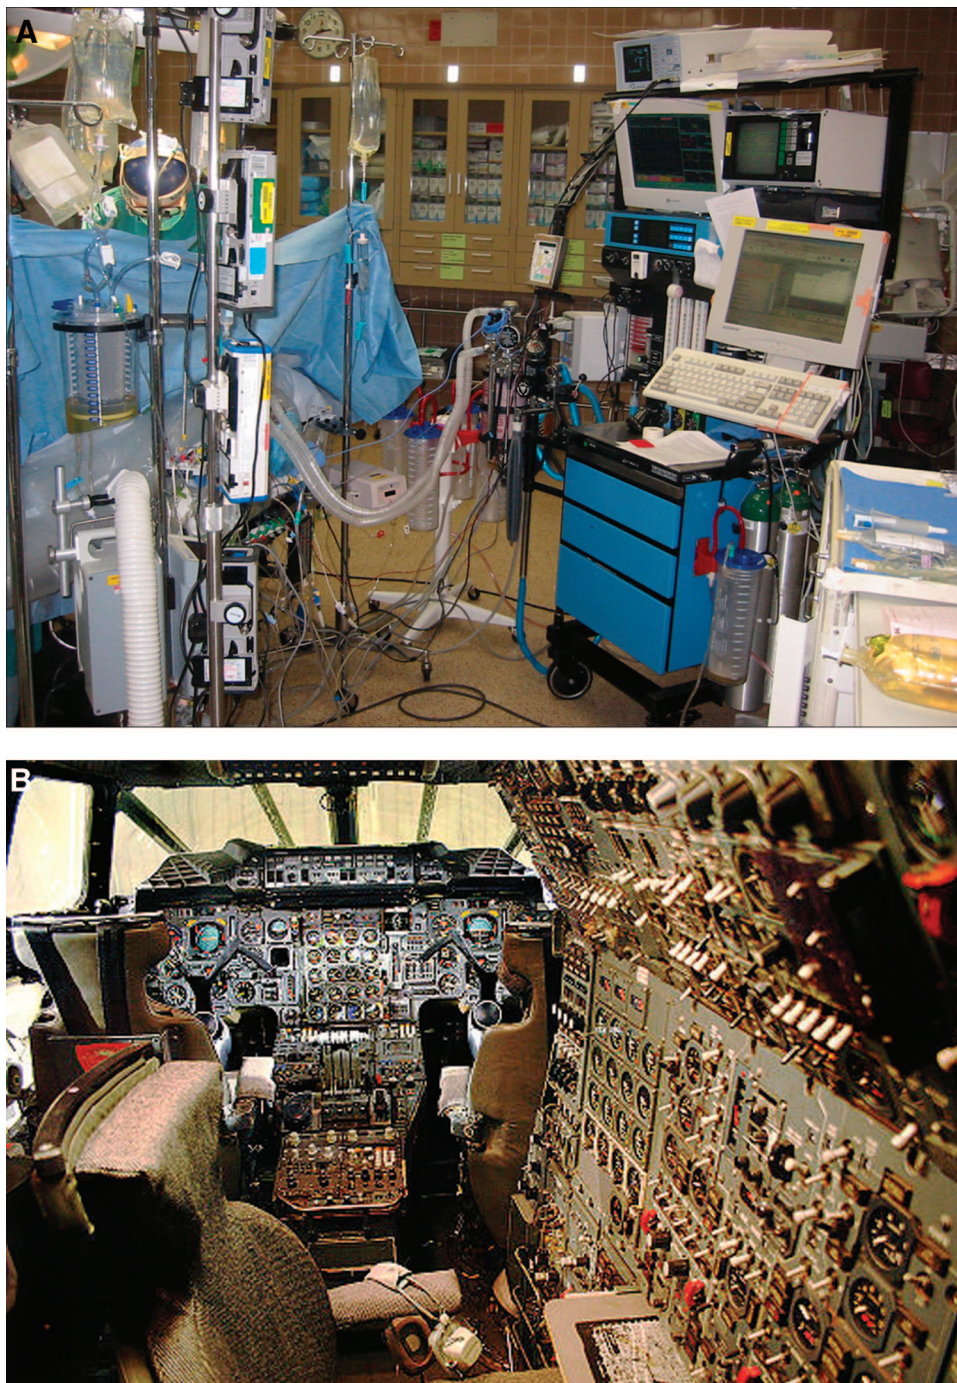

**Fig. 4.** (A) This is a photograph of a Drager anesthesia machine with separate monitors from the 1990s. The anesthesia machine has shelves with an electrocardiogram machine, capnometer, agent monitor, and pulse oximeter (all separate devices). There is no integration of these devices, and the data are generally recorded onto a paper record. This anesthesia machine setup has an early information system developed at the University of Michigan, Ann Arbor. It does have a keyboard and screen for an early information system. Reprinted with permission from David Karchner (Draeger Medical, Inc, Telford, PA). (B) This is the cockpit of the Concorde built in the 1970s. The dramatic increase in dials and gauges with high-/low-threshold alarms. This is the “multidevice” era of avionics, similar to the multimonitoring era of the 1980s and beyond in anesthesiology. This type of multiple alert monitoring and high-/low-threshold alarms were not functional when there was an immediate situation. Photograph taken by Martin J. Galloway, donated from the British Photo Encyclopedia Dotonegroup (available at: [http://commons.wikipedia.org/wiki/File:Concorde\\_interior.jpg](http://commons.wikipedia.org/wiki/File:Concorde_interior.jpg)).



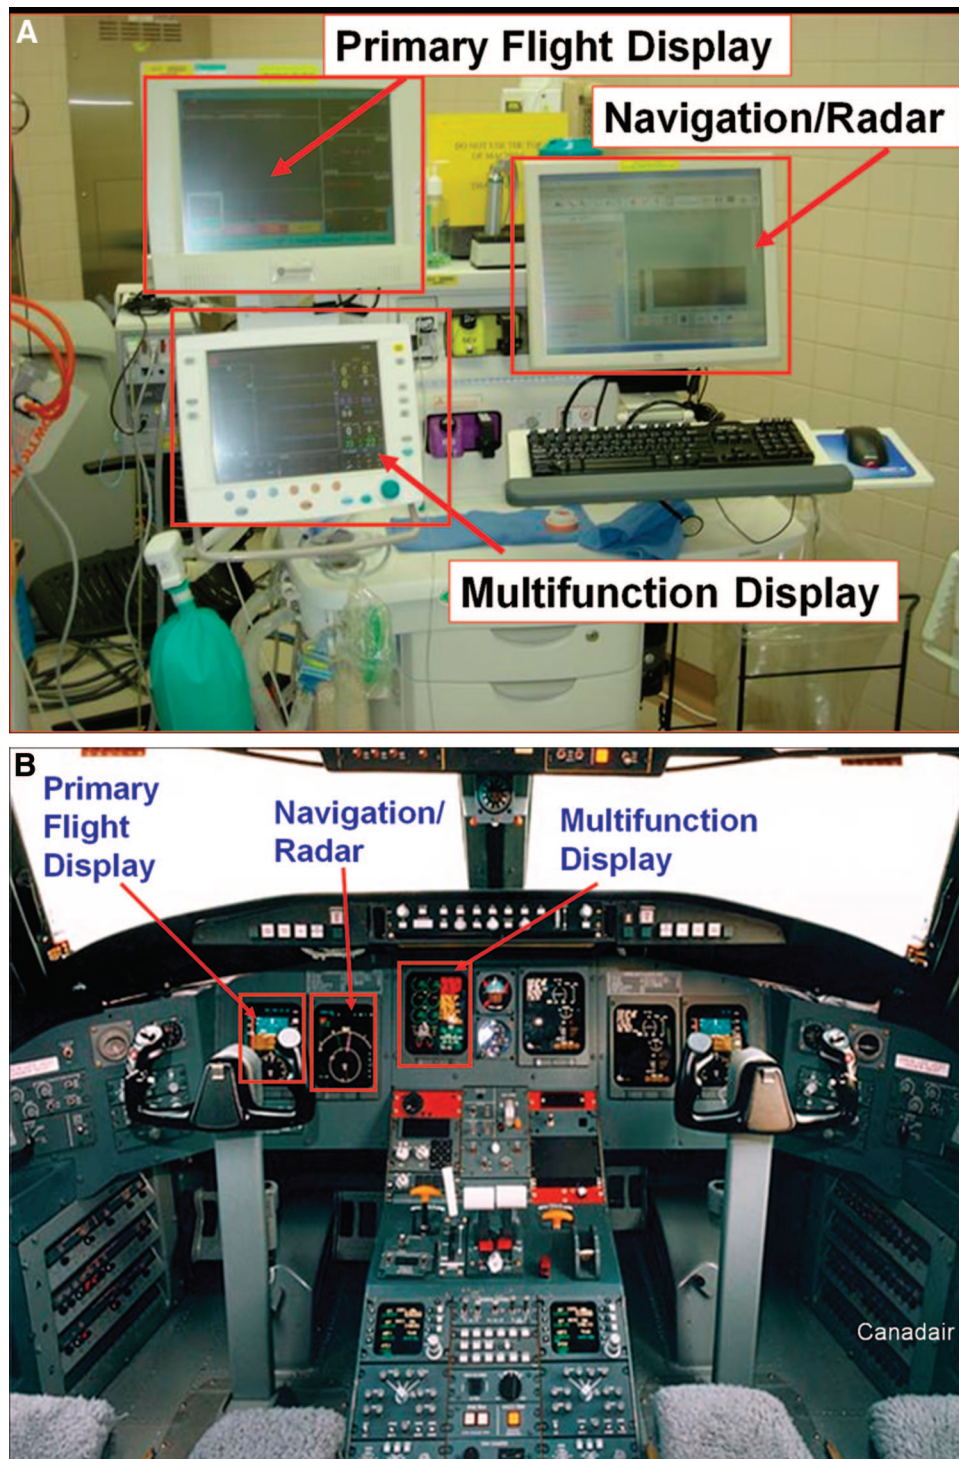

**Fig. 5.** (A) This is a 2007 GE Aisys Anesthesia Machine with an information system. This anesthesia machine has three separate screens: physiologic monitoring (primary flight display), anesthesia machine management (navigation/radar), and anesthesia information systems (multifunction display). This is similar to the three screens in a modern aircraft. Photograph taken from the University of Michigan, Ann Arbor, operating rooms. (B) This is the flight panel of a 2008 Regional Jet, Canadair commercial aircraft, used by SkyWest- $\delta$  with three screens: primary flight display, navigation/radar, and multifunction display. These three screens are duplicated for the copilot. Photograph from [Airliners.net](http://www.airliners.net/photo/United-Express-(SkyWest/Canadair-CL-600-2C10-Regional/1272158/L)) website, reprinted with permission (photographer: Gabriel Savit, AirTeamimages; available at: [http://www.airliners.net/photo/United-Express-\(SkyWest/Canadair-CL-600-2C10-Regional/1272158/L\)](http://www.airliners.net/photo/United-Express-(SkyWest/Canadair-CL-600-2C10-Regional/1272158/L))).

monitoring that recommended pulse oximetry.\* It is impressive that it was only 2 yr from the introduction of the device to its consideration as a standard of care by the ASA.

I refer to the combination of pulse oximetry and capnography as the “dynamic duo” for acute-care monitoring. Pulse oximetry ensures beat-to-beat oxygen saturation and pulse while capnography ensures breath-to-breath ventilation and pulmonary blood flow (cardiac output). It is difficult to imagine a life-threatening situation in which these two devices remain in the normal range. I believe that most would agree that the significant reduction in anesthetic-related mortality in the 1990s was because of the routine adoption of oximetry and capnography. Once the value of pulse oximetry was noted by anesthesiologists, it progressively spread to all acute-care areas of medicine, including intensive care units, step-down units, and emergency departments.

Before we leave the historic portion of this lecture, I would like to bring up other analogies between aviation and anesthesiology. Just as W. T. G. Morton, M.D. (1819–1868), a dentist, tried to obtain commercial value from his discovery by attempting to market ether as a new substance (*i.e.*, “letheon”), the Wright brothers also filed a series of patents on their flying machine in the hopes of obtaining commercial success.<sup>15,16</sup> Both attempts were to no avail. Morton’s attempt to disguise ether as another substance was discovered, disgracing him; although he is well recognized for his public demonstration of anesthesia, he never profited from it and died destitute. The Wright brothers also failed to profit substantially from their efforts. After years of litigation with Glenn H. Curtiss (aviator and founder of the US Aircraft Industry, 1878–1930), the federal government forced a resolution and suspended their patents. This was because World War I was approaching and the litigation was preventing development of aircraft for the war effort.<sup>17</sup> Again, the Wright brothers are noted in history for developing the first heavier-than-air flying machine but had to settle for a relatively small monetary reward. Other similarities between the

two fields are the preflight aircraft walk-around inspection and the pre-take off checklist. These are analogous to the anesthesia machine checkout. As we heard at last year’s Rovenstine lecture, given by Peter Pronovost, M.D., Ph.D. (Professor, School of Medicine, Department of Anesthesiology, Critical Care Medicine, and Surgery, Johns Hopkins University, Baltimore, Maryland), preprocedure checklists and recently adopted time-outs, now routine before surgical procedures, can be valuable.<sup>18,19</sup> Each of these processes was adopted in the aviation industry well before its “discovery” in medicine. The analogies go on and on. Filing a flight plan before the flight has been routine, just as the anesthesia workup with an anesthetic plan is a required part of our practice. Aircraft between the 1930s and 1970s progressively developed in complexity and dramatically increased the number of gauges and monitoring devices to alert the pilot about the status of the aircraft. During anesthesia, starting in the 1980s, the number of monitoring devices progressively increased to allow for close monitoring of patient status. Flight time restrictions on pilots were adopted in 1978, and anesthesia work hour restrictions for trainees were adopted in the United States in 2001.<sup>†20</sup> The Federal Aviation Agency was established in 1950 to improve safety and apply uniform standards to the aviation industry; the ASA established the Anesthesia Patient Safety Foundation to improve safety in 1986.<sup>‡21</sup> The National Transportation Safety Board started an aviation accident database in 1962, and the ASA developed a closed-claim investigation task force in 1991.<sup>§</sup> Finally, last but not least, flight simulators for training and certification and anesthesia simulators for training and ultimately certification were developed. Because our fields seem to be so similar, it might be useful to see what the aviation industry has done in the past 25 yr to predict what we most likely will be doing in the next 25 yr.

### Anesthesiology Moves into the Digital Age

If you look at the progression of aircraft instrumentation, aircraft became more complex (*i.e.*, more gauges and dials appeared using simple high- and low-threshold alarms with little integration or intelligence) (fig. 4, A and B). Unfortunately, as the number of gauges increased, the ability for a human to monitor those gauges actually decreased.<sup>22</sup> Human factors research has demonstrated that when multiple high- and low-alert limits are used from multiple gauges, the normal response is to either silence the alarm limits or place them at such wide thresholds that they become nonfunctional.<sup>22</sup> If something does happen immediately and multiple monitors are in range at the same time, the alarms become distracting and prevent the pilot from focusing on the most important problems first. Thus, the designers of cockpits integrated alarms and prioritized those alarms; today, aircraft have three screens (*i.e.*, navigation [radar], primary flight display, and multifunction display) (fig. 5, A and B).<sup>#</sup> With the advent of global positioning system, the navigator has been replaced by a navigation screen that tracks the whereabouts of the aircraft along its planned course. The primary

\* American Society of Anesthesiologists Standards for Basic Anesthetic Monitoring (Committee of Origin: Standard and Practice Parameters). Approved by the ASA House of Delegates on October 21, 1986. Available at: <http://www.asahq.org/For-Members/Clinical-Information/Standards-Guidelines-and-Statements.aspx>. Accessed October 25, 2010.

† Federal Aviation Administration. Sec. 135.265 crewmember flight time and duty period limitations and rest requirements. Available at: [http://rgl.faa.gov/regulatory\\_and\\_guidance\\_library/](http://rgl.faa.gov/regulatory_and_guidance_library/). Accessed July 21, 2010.

‡ Birth of federal aviation agency: history. Federal Aviation Administration Web site. Available at: <http://www.faa.gov/about/history> (page 2). Accessed July 28, 2010.

§ National Transportation Safety Board Aviation Accident Database and Synopses. Available at: <http://www.ntsb.gov/ntsb/query.asp>. Accessed October 25, 2010.

|| American Society of Anesthesiologists Closed Claim Project. Located at the Department of Anesthesiology and Pain Medicine of the University of Washington in Seattle. Available at: <http://depts.washington.edu/asaccp/ASA/index/shtml>. Accessed July 21, 2010.

# Bombardier CRJ700 Canadair Regional Jet Airliner, Canada: The CRJ700 flight deck showing cockpit instrumentation: image. Available at: <http://www.aerospace-technology.com>. Accessed July 26, 2010.



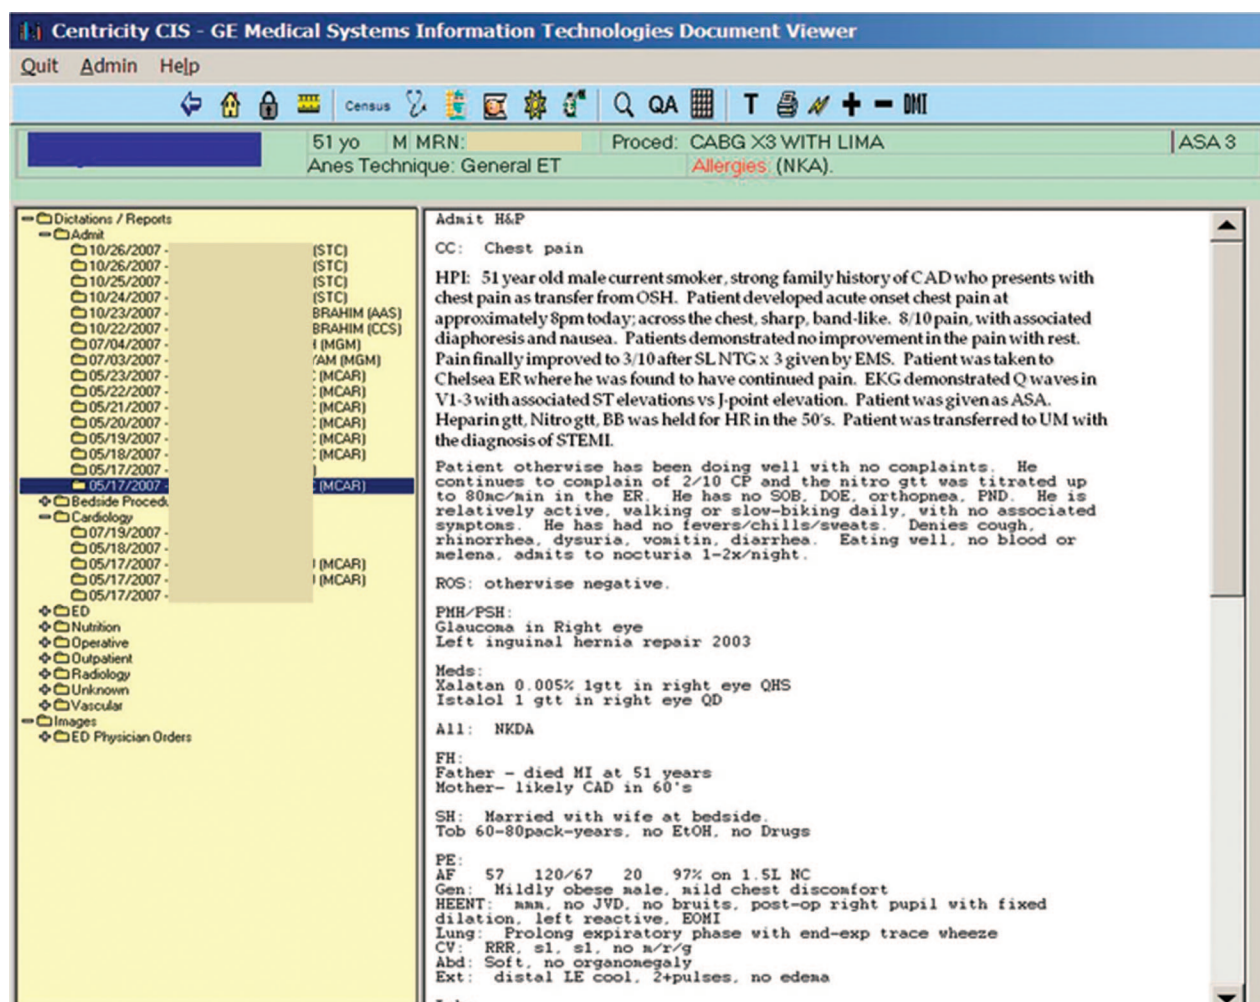

**Fig. 6.** A copy of a dictated history and physical of a patient with a history of coronary artery disease (CAD). Although it is clear after reading the first few sentences that this patient has a strong family and personal history of CAD, it would be difficult to perform a text search and be sure that the patient indeed had CAD. You would have to query for a “history of CAD” that was not preceded by “does not have.” You would have to search for *coronary artery disease* or *CAD* or *ischemic heart disease*. Performing a word search would not be reliable to assess this patient’s history of CAD.

flight display linked to the multifunctional display produces an integrated system tracking the status of the aircraft and alerting the pilot to issues of concern, whether related to the mechanical function of the aircraft or its flight status.

When looking at a current anesthesia machine, with its monitors and a paper record, it looks much like an aircraft shortly after World War II: many dials with high/low alarms, navigation by pen and paper (the anesthetic record), and no integration of information that could be considered a primary flight display equivalent. With the advent of AIMS, providing electronic “navigation,” integrated monitoring systems, and electronic anesthesia machines, we have the opportunity to mimic the aircraft industry by integrating these information sources. This will allow us to manage patients more specifically by using data from current physiologic monitors and the anesthesia machine and from the patient’s medical history and laboratory data to develop the “multifunctional display” and “primary flight display”; in

medicine, this is called decision support. There are many examples of automatic decision support being used, such as reminders for antibiotic timing (either pop-up displays on an information system or  $\alpha$ -numeric pages), alerts for abnormal laboratory values, and alerts for the potential of awareness during anesthesia.<sup>23–25</sup> The integration of these multiple sources of data provides us with the opportunity to move into a new era of perioperative care. We may have the opportunity to reduce our anesthetic-related mortality to lower than 1 in 200,000 individuals, but we may also have the opportunity to reduce the postoperative complications (*e.g.*, myocardial infarction, renal failure, and stroke) by optimizing and individualizing our perioperative care based on patient- and procedure-specific personalized care plans.

### AIMS and Outcomes Research

An AIMS is composed of several components: an electronic anesthesia history and physical (H&P) examination findings, an



intraoperative record, and procedures and postoperative documentation. In addition, these systems usually have interfaces with the hospital's electronic medical record. They have interfaces with the admission/discharge, the operating room scheduling, and the laboratory systems; in addition, they have an interface to be more functional with the e-mail and paging systems. Originally, when they first appeared, AIMS were called anesthesia record keepers because all they did was replicate the handwritten intraoperative record. Unfortunately, the companies who developed these systems did not survive because there was little value in replacing an inexpensive process (paper and pen) with an expensive electronic system, other than what was considered to be more accurate documentation.<sup>26,27</sup> For this reason, the electronic medical record, in most institutions, has progressed while most anesthesia departments have stayed with paper. As a society, we have not mandated these systems because they have been expensive and difficult to justify. Although there have been various attempts to develop a return on investment for an AIMS, I believe the most compelling reason to implement an AIMS is that the entire medical record will become electronic and that we (the field known for its advances in technology) should not be left out of the electronic age. Of the components of an AIMS, I believe the most important part is the electronic anesthesia workup (H&P). I hope to demonstrate why this part of an AIMS may allow us, as a specialty, to make a significant contribution to medicine.

### Anesthesia H&P

An anesthesia H&P, or a preoperative evaluation, is unique among H&Ps in traditional medicine. In the paper world, an anesthesia evaluation is usually one sheet of paper with a variety of boxes that are checked to enable someone to quickly review the key organ systems and assess their status. Our evaluations are quick and focused. A traditional H&P, as we learned in medical school, has the following components: chief complaint, history of present illness, medical history, review of systems, impression, and plan. If you look up H&Ps in the electronic medical record of most institutions, you will find that the H&Ps follow this general format and are dictated and transcribed, therefore providing a readable "story" describing patients' problems and concluding with an impression and plan. The benefit of transcribing this into an electronic data repository enables the H&P to be viewed by multiple people and multiple places at any time. Unfortunately, it is still a text story. It does not allow us to perform outcomes research, which would require specific fields to be completed or picked, as opposed to transcribing text. Attempts have been made to make smart word searches to extract specific comorbidities or conditions from text H&Ps, but these are fraught with problems, as you can imagine (fig. 6). Although the patient in figure 6 has a written history of coronary artery disease, it could easily state "pa-

tient does not have a history of coronary artery disease" or "father has history of coronary artery disease." The number of word combinations to try to determine whether this patient has coronary artery disease is endless. Because of the limited value, from a clinical research perspective, of these text electronic records, most large clinical research databases require trained researchers to read the text and extract the pertinent history and comorbidities and enter them into a relational database, which can then be queried. An example of a system like this in our field is the Multicenter Study of Perioperative Ischemia Research; and in surgery, it is the National Surgical Quality Improvement Project (NSQIP).<sup>\*\*28</sup> These clinical research databases with patient information in queryable data fields have been extremely useful in outcomes research, examples of which I will describe later.

Now, I will contrast an anesthesiology H&P with a traditional medical H&P. For example, a patient is being scheduled for a cholecystectomy. The surgical H&P describes this patient as having the chief complaint of postprandial periepigastic pain. The history of present illness describes this "40-yr-old woman was previously in good health until several months ago, when she noted increasing symptoms of colicky pain after eating fatty foods." The history of present illness describes in more detail what aggravated the symptoms, what alleviated the symptoms, and what the patient had done about those symptoms. This was followed by a medical history in which the patient states that she took "birth control pills and has occasional back pain for which she takes Aleve." She also had a history of postpartum depression after her first child, 15 yr ago. She had taken some over-the-counter medications to help curb her appetite. After this descriptive story of chief complaint, history of present illness, and medical history; the surgical workup briefly lists a review of systems. In contrast, we, as anesthesiologists, really do not care about much of this story.

Cholecystitis has been diagnosed, and the treatment plan (cholecystectomy) has been chosen. Therefore, from an anesthesiology viewpoint, we have little interest in how the patient got to the operating room; we only want to know what surgical procedure is planned. On the other hand, we have a serious interest in the review of systems (*i.e.*, the patient's comorbidities, how they affect the patient's physical status, and how they will affect our plan). Our chief complaint, history of present illness, consists of the following: "has gallbladder, doesn't want it." The end. We actually do not ask a patient his or her medical history because it is too time-consuming to have the patient describe his or her version of the medical history; it is much more efficient for us to immediately go to a review of systems. In actuality, an anesthesia H&P is a detailed review of systems in which the pertinent history, the pertinent signs and symptoms, and management are documented (fig. 7). What we really do is review the patient's physical status, organ system by organ system, for risk stratification. In fact, we are the original risk stratifiers (*i.e.*, ASA physical status is the oldest and most

<sup>\*\*</sup> Ischemia Research and Education Foundation Web site. About us introduction. Available at: <http://www.iref.org/intro.html>. Accessed July 28, 2010.

The screenshot displays the Centricity CIS software interface. At the top, the title bar reads "Centricity CIS - GE Medical Systems Information Technologies". Below the title bar is a menu bar with "Quit", "Admin", and "Help". A toolbar contains various icons for editing and navigation. The main window is titled "Testing, Centricity" and shows patient information: "76 yo F MRN: 123456789", "Proced: testing", and "Anes Technique: Allergies: Alcohol -> Blisters, Alcohol -> Diarrhea, -> Nausea, ->".

The "History" section is expanded, showing a list of medical events. The "Cardiovascular" section is also expanded, displaying a table with columns for "Functional Capacity", "Cardiac Symptoms", "Hypertension", and "Coronary Artery Disease". The "Coronary Artery Disease" field is selected, and a dropdown menu is open, showing the "Angina Class" options: "0-Asymptomatic", "1-Sx w/ strenuous activity", "2-Sx w/ moderate activity", "3-Sx w/ 1 flight or 2 blocks", and "4-Sx w/ any activity or rest".

The "Angina Class" dropdown menu is open, showing the following options: "0-Asymptomatic", "1-Sx w/ strenuous activity", "2-Sx w/ moderate activity", "3-Sx w/ 1 flight or 2 blocks", and "4-Sx w/ any activity or rest". The "Done" button is highlighted.

**Fig. 7.** This figure shows a series of drop-down lists that require an individual to select “coronary artery disease” within the cardiovascular section. Within the coronary artery disease (CAD) field, there are four subfields: stability, angina class, treatment, and other. Within the angina class, third level is a selection list of 1–4 with descriptions (0 indicates asymptomatic; 1, symptoms with strenuous activity; 2, moderate activity; 3, 1 flight or 2 blocks; 4, any activity or rest). This series of sections, fields, and subfields (all with pick lists) allows the provider to complete a relational database describing the patient’s comorbidities, which are all questionable.

recognized risk stratifier).<sup>29</sup> By the way, who do you think developed ASA physical status? E.A. Rovenstine, M.D. (1895–1960, Emery A. Rovenstine, Professor and Chair, Bellevue Hospital and New York University School of Medicine, New York) with two other colleagues.<sup>29</sup> Risk stratification is our primary concern as we try to assess the patient regarding suitability to undergo the planned procedure, tests that may be needed to further evaluate organ systems at risk, and how to plan the anesthetic to minimize damage to any organ system, allowing the patient to undergo the procedure as safely as possible. Interestingly, risk stratification (risk adjustment) is a key element of all of clinical outcomes research.<sup>28,30</sup> It is meaningless to compare outcomes of various groups unless they have been risk stratified. This was the primary conclusion when the Veterans Administration started their surgical outcomes project more than 20 yr ago.<sup>30</sup> Clearly, patients with more comorbidity would have a worse outcome when undergoing the same procedure. Unfortunately, the clinical databases being developed by other

specialties, NSQIP, the society thoracic surgeons, and others (of which there are many) all require manual entry of data extracted from the medical record or an interview with the patient by a trained researcher.<sup>28,30</sup> This process would be prohibitively expensive to apply to all patients. In addition, because these data fields are designed by research groups in advance and implemented through many institutions, the research data fields are relatively static. They do not change with time (*i.e.*, they do not add fields regularly because it would be too disruptive to many data collectors at many institutions). On the other hand, anesthesiologists provide this risk stratification with the anesthesia H&P on every patient. If done so in an AIMS with data fields, we are populating our “clinical research database” as part of our standard care. Thus, it is actually “free”; we do this with our preoperative H&P, intraoperative documentation, and postoperative documentation.

As an example, I will describe the first simple study we conducted using our AIMS at the University of Michigan,



Ann Arbor. In 2003, while attempting to mask ventilate a patient after the induction agent was given, I asked Richard Han, M.D. (a first-year anesthesia resident at the University of Michigan, 2003) how difficult it was for him to ventilate the patient. As he attempted to explain this to me, we realized it would be easier if we graded his ability to mask ventilate as follows: easy, medium, hard, or impossible. After the case, we reviewed the literature and found an excellent article that had been published on the topic by Langeron *et al.*<sup>31</sup> Langeron *et al.* had an observer classify 1,502 cases as easy, difficult, or impossible (with specific descriptor definitions of each); the incidence of difficult was 5%, and only 1 of the 1,502 cases was classified as impossible. The independent predictors of difficult mask ventilation were as follows: a beard, body mass index more than 26 kg/m<sup>2</sup>, lack of teeth, older than 55 years, and history of snoring. We took the idea of Langeron *et al.* and decided to make the following scale: 0, mask ventilation was not attempted; 1, ventilated easily by mask; 2, ventilated by mask but required an oral airway, relaxant, or another adjuvant; 3, difficult mask ventilation (described as inadequate, unstable, or requiring two providers); and 4, unable to mask ventilate. We modified the definitions of Langeron *et al.* to make them easier to apply clinically. These choices were placed into the intraoperative record as a drop-down pick list; then, we waited. In 3 weeks, we had accumulated 1,405 cases. We found 1.6% of the cases were difficult by our definition and 1 of 1,405 was impossible, similar to the 1 of 1,502 noted by Langeron *et al.* We published this as a "Letter to the Editor"<sup>32</sup> as a scale we thought was more easily used clinically than first proposed by Langeron *et al.* Now for the impressive part. We waited 1 yr and did nothing but wait for the data to accumulate. At the end of 1 yr, we queried the database for 41,969 cases. This query resulted in 1.5% of the cases being difficult and 0.17% of the cases being impossible. We were able to determine independent predictors of difficult mask ventilation, impossible mask ventilation, and the combination of difficult mask ventilation and difficult intubation.<sup>33</sup> In addition, of the 28 patients who could not be ventilated, 27 were easily intubated and only 1 required a surgical airway.<sup>33,34</sup>

This article demonstrates the extraordinary power of using clinical outcomes data from a relational database derived from routine clinical care. To grasp the impact of this type of clinical research, it is useful to compare it with our clinical research accepted standard (*i.e.*, the prospective, randomized, double-blind, placebo-controlled trial). Randomized controlled trials are considered the strongest evidence because they involve detailed protocols that focus on a specific treatment being studied; in addition, because of their controlled randomized nature, they eliminate other causality and thereby prove a cause-and-effect relationship. In addition, to eliminate a type II error, the studies are sized by a power analysis. Unfortunately, there are significant limitations to randomized controlled trials. (1) As previously stated, infrequent events require many patients, but the cost per patient of running a randomized controlled trial necessitates a relatively small study, again sized (powered) for the effect of the

treatment being studied. (2) These trials cannot be powered for the unknown side effects of the treatment. (3) Once a controlled trial has proved the effectiveness of a treatment in a few patients being treated under a detailed protocol (which is not necessarily routine clinical practice), the treatment is generally extrapolated to the population at large. This can lead to substantial problems (*i.e.*, rofecoxib [Vioxx] and aprotinin are two examples).<sup>35–37</sup> On the other hand, large clinical databases can be derived from a variety of sources, including AIMS. They have the power of size and the advantage of being clinical practice with all its variation. They do require different statistical tools, such as propensity score matching, that I will briefly review later. They also require objective data gathering for outcomes. In general, outcomes are the weakest part of an AIMS clinical database. Because we see patients at 24 h and many of the outcomes are not evident at that time, many of the important adverse outcomes of interest are not entered into our clinical systems. Therefore, we must rely on other objective outcomes, such as death, cost, troponins, and creatine values.

The lack of a study protocol leads to another opportunity for outcomes research. Because the care in large clinical databases is routine clinical care and not protocol driven, we can study variables that could not be studied in a prospective manner (*e.g.*, the effect of significant hypotension [blood pressure lower than 70 mmHg] on outcomes in elderly persons). It would be unethical to request Institutional Review Board approval for a study evaluating low blood pressure in the elderly population to assess its effect on outcome; however, in a large clinical database, hypotension is bound to occur and can be studied. Similarly, the wide variation in provider care (lack of protocol) is an asset, not a limitation, of this type of research because the protocol of interest can be "extracted."

### **Different Type of Research, Different Type of Statistics: Propensity Score Matching**

For those statisticians reading this article, please skip to the next section; for clinicians like me, the following discussion may be informative. We are all familiar with the types of statistical techniques used in prospective, randomized, controlled trials, as previously stated, power analysis to determine sample size and  $P < 0.05$  to assess the significance of the results. When trying to determine the difference between one method of treatment and another, from a retrospective clinical database, how do you determine the control group? The answer is by using a statistical technique called propensity score matching. For example, the article by Karkouti *et al.*,<sup>37</sup> published in 2006, regarding the adverse consequences of aprotinin use in cardiac surgical patients will be reviewed. This article, along with one by Dennis Mangano, M.D., Ph.D. (Professor, University of California, San Francisco; and Founder and Director, The Ischemia Research and Education Foundation, San Bruno, California), was responsible for the use of aprotinin in cardiac surgery being reevaluated. The subsequent large, multicenter, prospective

study then resulted in aprotinin being pulled from the market after 18 yr of what was thought to be safe use.<sup>36–38</sup>

First, Karkouti *et al.*<sup>37</sup> had a large database of patients who underwent cardiac bypass surgery who received either aprotinin or tranexamic acid to reduce perioperative blood loss. All the patient characteristics (*i.e.*, age, weight, and comorbidities) were significantly different ( $P < 0.05$ ) between the 586 patients who received aprotinin and the 10,284 patients who received tranexamic acid; clearly, there was a selection bias regarding drug treatment and the outcomes cannot be compared. Second, the next step was to develop an equation that will calculate the probability that an individual patient would be treated with aprotinin. We use the data from all the patients to derive this predictive equation. The equation is derived using the technique referred to as logistic regression, which determines the probability that any individual patient with the listed characteristics will be treated with aprotinin. This predictive model (equation) is tested for its predictive “quality” using a receiver operating curve. If the area under the receiver operating curve is 0.75 or greater, it is considered a good predictive model. By using this predictive model (equation), you can determine a probability (propensity score) for each patient who would have been predicted to be treated with aprotinin (*i.e.*, each of the patients in both treatment groups will receive a propensity score, a probability score that he or she would have been treated with aprotinin). Third, patients who were treated with aprotinin are matched with those who were not treated with aprotinin (those treated with tranexamic acid, the control group) who had the same propensity scores (*i.e.*, propensity score–matched patients). In the study by Karkouti *et al.*, 449 patients treated with aprotinin and 449 patients treated with tranexamic acid were matched 1:1 with the same propensity (probability) scores. When these two groups are compared for patient variables (*e.g.*, age, weight, and comorbidities), the  $P$  values are all  $>0.05$ , meaning that these two groups of patients are not significantly different for preoperative characteristics. These propensity score–matched groups are analogous to the data presented as the first table in a prospective randomized study (the table that ensures that the randomization was effective in having similar types of patients in each group [treatment and control]). Once there are two patient groups with the same characteristics, we can look at any statistical difference in outcome. In this study, there was a statistically significant increase in renal dysfunction and renal failure in the patients treated with aprotinin compared with those treated with tranexamic acid. Armed with this technique, retrospective clinical databases can be used to compare treatments and outcomes at low cost compared with prospective studies; with such large numbers, they are able to find rare side effects that could not be found in small prospective studies. In an editorial by Gus Vlahakes, M.D. (Chief of Cardiac Surgery, Massachusetts General Hospital, Boston), which accompanied Mangano’s article in *The New England Journal of Medicine*, he stated that conducting large postrelease clinical da-

tabase reviews such as these is a new responsibility to ensure treatments that we find effective in smaller prospective studies do not have unrecognized adverse consequences when applied to the general population in clinical practice.<sup>39</sup>

Unfortunately, despite the tremendous value of large database retrospective research and propensity score matching, these types of studies are still not a replacement for the randomized controlled trial; only prospective randomized trials can truly determine the cause and effect of a treatment. Only large database retrospective reviews can determine side effects and associations. Therefore, each of these types of studies functions synergistically to advance medical knowledge. Retrospective studies can identify rare events and help us design appropriate prospective studies, which can then determine causation. Once these studies are complete and a new therapy or treatment is recommended, it would need to be followed up, ultimately with another retrospective review after that therapy has been applied to the population at large.

Despite the power of retrospective clinical databases, there are significant limitations. First, the variables that are important to the question being asked must be in the database. For example, if someone was reviewing preoperative airway evaluations to predict grade view on intubation, but the preoperative evaluation did not include Mallampati scores, it may not be an effective predictive model (which should be identified by a poor receiver operating curve score). Second, these are clinical data extracted from clinical care, entered by practicing clinicians. Therefore, the data will not be as “clean and accurate” as data collected by a professional researcher focused on a randomized controlled trial. Consequently, it is important that researchers using large databases understand the origin of the data and their limitations and develop techniques to clean the data before using them in an analysis.

These retrospective database queries are not the old paper chart reviews sometimes referred to as “garbage in/garbage out” research. Instead, in the generation of recycling, it is not garbage in but trash in; after appropriate cleaning and analysis, it can give us excellent recycled clinical outcomes research results.

### **Multicenter Perioperative Outcomes Group and the Anesthesia Quality Institute**

During the past decade, it has become clear to academic institutions that have implemented AIMS that the clinical databases we are developing are powerful research tools. Pooling data from these AIMS clinical databases from multiple institutions around the country would provide more data, a broader patient context, and more varied clinical practices. The strengths of outcomes data are the variations in care and not strict adherence to protocols (*i.e.*, just the opposite of prospective studies, making a nationwide database an even more powerful research tool). In the summer of 2008, nine institutions met in



Ann Arbor, to form the Multicenter Perioperative Outcomes Group (MPOG), with the vision of creating a data-sharing organization to enable faculty from multiple institutions to query one large data repository consisting of AIMS data from across the nation. One of the premises of this organization was that it would be inexpensive and that the membership “fee” would be the contribution of 10,000 cases entered into the database. Faculty from all the involved institutions would have the opportunity to request data from the database to answer clinical questions.<sup>††</sup> The goal of this new type of “open access” research database is to stimulate ideas from the broadest spectrum of clinical researchers/clinicians and thereby accelerate the creation of new knowledge. The MPOG has 35 member institutions and is in the process of writing the necessary software to allow data from the seven most commonly used AIMS vendors to be downloaded into the common MPOG research database. Hopefully, by the end of this year, the first MPOG research studies will be under way, initiating a new era of clinical research.

Coincidentally, in the summer of 2008, the ASA board approved the creation of the Anesthesia Quality Institute (AQI).<sup>‡‡</sup> This institute was founded to develop a quality reporting database that could be used by all ASA members. Clinical data from a variety of sources (*i.e.*, individual practices, hospitals, anesthesia billing systems, and AIMS) could be retrieved and could flow into a National Anesthesia Clinical Outcomes Registry. From there, data would flow into the AQI, where analysis could be conducted and outcome quality reports could be generated. This would enable our society to participate in the national quality efforts being proposed/mandated in a relatively cost-effective manner. Within 6 months of its founding, the AQI recruited Richard Dutton, M.D. (Professor, Department of Anesthesiology, University of Maryland School of Medicine, Baltimore). The following year, Rick and I, along with Sachin Kheterpal, M.D. (Assistant Professor, Department of Anesthesiology, University of Michigan), the research director of MPOG, met to outline a working relationship between MPOG and the AQI. Although these are separate organizations, the AQI is a member of MPOG and will be able to request data for quality research studies, as any other MPOG member. We envision each of these organizations growing in a synergistic and collaborative way to enhance the development of new knowledge from an academic perspective and advance quality from a patient care perspective. The MPOG will be the high-resolution data repository, including all basic AIMS data, whereas the AQI will focus on the production of quality reports for the ASA membership.

<sup>††</sup> Available at: <http://mpog.med.umich.edu/>. Accessed November 1, 2010.

<sup>‡‡</sup> American Society of Anesthesiologists [news release]. Anesthesia Quality Institute (AQI) executive director named (July 13, 2009). Available at: <http://www.asahq.org/news/asanews071309pr.htm>. Accessed July 26, 2010.

Although the NSQIP, developed by the American College of Surgeons, is a tremendous database with respect to preoperative and postoperative outcomes, it uses an expensive method of collecting data and it only collects a 20% sample of general and vascular surgery patients.<sup>28</sup> At the University of Michigan, it costs \$250,000/yr to collect this 20% sample of these two surgical services (Michigan enters approximately 400 of the 65,000 cases conducted each year). Therefore, the NSQIP model could not be adopted by the AQI and expanded for all of the surgical services and cases. The AQI and MPOG will use the extracts of clinical data from patient care to include all patients who receive anesthesia care. This is more cost-effective and will allow for a constantly growing database (in size and breadth). In addition, one of the core values of the NSQIP is preoperative risk stratification. Again, because of the way anesthesiologists think when they conduct a preoperative evaluation and the way the AIMS preoperative anesthesia H&Ps are developed, a core value of the MPOG database will be the ability to risk-stratify patients and thereby conduct outcome propensity score-matched studies on a grand scale. Because of our unique way of approaching patients as risk stratifiers, I believe we have the opportunity as a specialty to make an important contribution to the future of clinical research. The data we collect will be entered into a relational database because we, as a specialty, think in objective terms, categorizing patients into grading systems and using checklists. We also are somewhat unique in medicine in that we see everyone (both sexes, young and old, healthy and sick). Therefore, we should be able to make a contribution to medicine in the broadest terms. One of the greatest accomplishments of medical research from the past decade was sequencing the human genome.<sup>40</sup> I believe that anesthesiology, during the next decade, may be recognized for developing the human phenotype as we populate the nationwide perioperative database. This clinical database will be populated with subjects (operative patients) who will be characterized with an array of individual conditions, including age, sex, comorbidities, and medications; and who will all undergo a significant stress test to all of their vital organs (anesthesia and a surgical procedure). This stress test will be like no other. It will stress the cardiovascular, pulmonary, central nervous, coagulation, and immune systems; in addition, it will include pharmacodynamic responses to multiple intravenous medications. No Institutional Review Board would approve such a stress test; the beauty of this stress test is that the data are collected at no additional cost. Imagine a large enough database in which we will be able to characterize, at a granular level, multiple groups of patients and characteristics and develop a profile (phenotype) that will enable us to construct specific perioperative care plans. What we refer to as decision support may soon be referred to as “designer clinical management,” analogous to the designer drugs that are envisioned based on an individual patient’s genotype. Again, like many other good ideas, collecting surgical and anesthetic information together for the purposes of outcomes research is not new. In 1934 (before computers), an article was published in *Anesthesia & Analgesia*

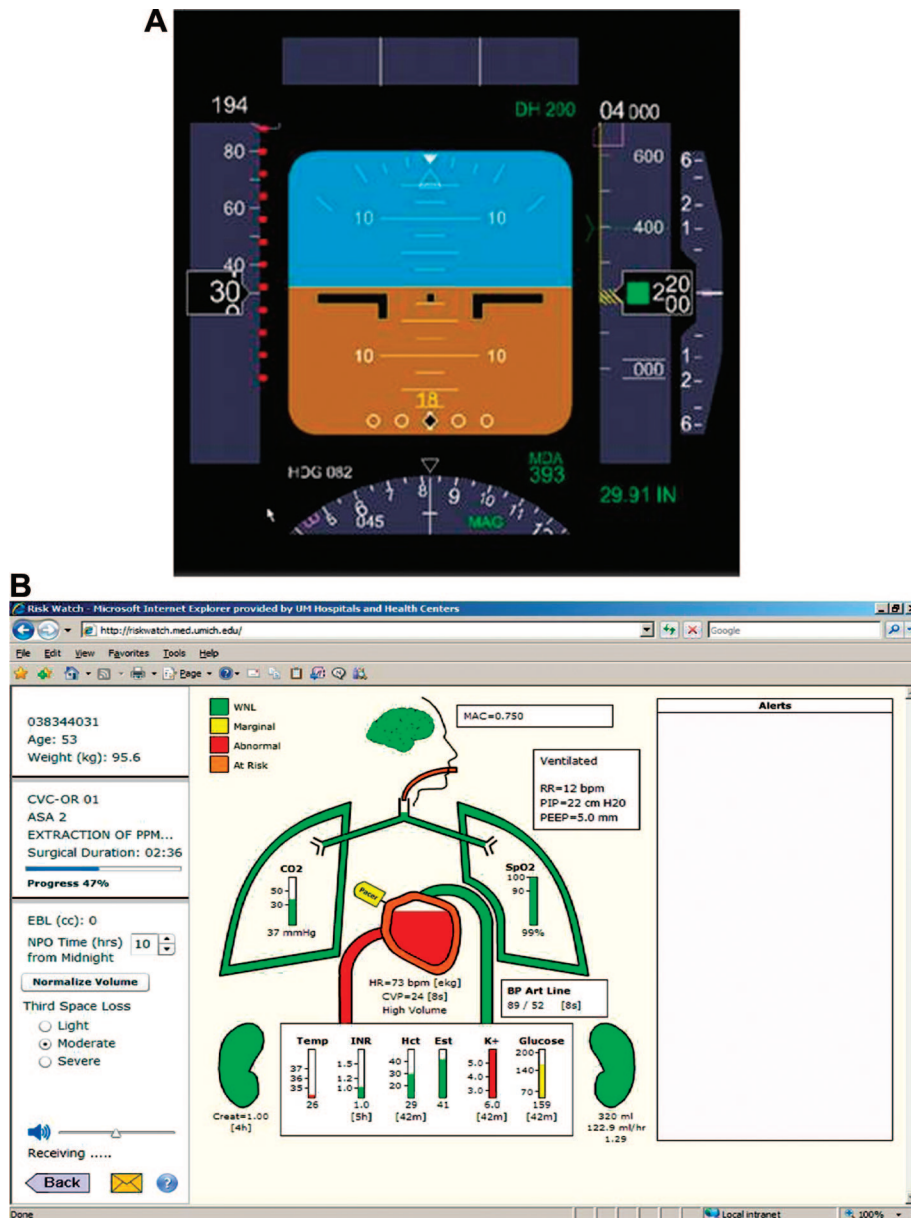

**Fig. 8.** (A) Avionics from a modern aircraft. This is a picture of an avionic screen from a Boeing aircraft that integrates information to provide the pilot with visual alerts, allowing for simultaneous management of the aircraft's integrity, lift, yaw, pitch, air speed, and navigation. Photograph from Integrated Electronic Standby Instrument from Thales Aerospace Division Web site (available at: <http://www.thalesgroup.com/aerospace>; accessed November 10, 2010). Reprinted with permission from Thales Avionics, Saint-Laurent, Quebec, Canada. (B) The visual alert system (RiskWatch) is a prototype "avionics" display for anesthesia. It integrates live data from the physiologic monitors, the anesthesia information management system (AIMS), the history and physical (H&P), and the laboratory in a color-coded graphic display. Green indicates normal range; yellow, marginal range; red, abnormal range; and orange, "at risk." The system shows the heart beating with the heart rate and the lungs inflating and deflating with the respiratory rate. The level (filling volume) within the heart is calculated using continuous I and O calculation based on the patient's weight and nothing by mouth (NPO) time, estimated blood loss (EBL), and fluid resuscitation. Data regarding adequate filling volume are automatically retrieved from systolic pressure variation, central venous pressure (CVP), or pulmonary diastolic if those data are available. (Left) Characteristics of the case. (Middle) The moving diagram with each organ system. (Below) The pertinent laboratories. If any system has risk factors that are derived from the patient's H&P, they are orange. The box on the right is where alerts are displayed. It automatically alerts when any variable is out of a safe range and for presumptive diagnoses of tension pneumothorax and potential malignant hyperthermia. The patient has risk factors for a difficult airway and heart disease (this patient has a pacemaker). There is a high filling volume (CVP = 24 mmHg) and high potassium concentration. Reprinted with permission (Kevin K. Tremper, University of Michigan, Ann Arbor).



on combining anesthetic and surgical records for statistical purposes, by guess who? Yes, again it is E. A. Rovenstine.<sup>41</sup>

### *Clinical Decision Support Goes to Fly-by-wire*

In 1995, the Airbus 320 was launched as the first fly-by-wire commercial aircraft.<sup>42</sup> This had long been a requirement for military fighter aircraft to allow them to fly at extreme speeds with high maneuverability and still stay airborne. §§ Flying-by-wire refers to the design of the controls of the aircraft; the pilot controls the yoke to guide the plane but that yoke is not connected to any of the ailerons or tabs by mechanics or hydraulics. It is connected to a computer and the pilot uses the yoke to tell the computer which way he or she would like to fly; the computer then processes that information and makes a series of complex changes in the ailerons, rudder, and tabs to make the plane do what the pilot wants it to do. It had become impossible to fly top-performance fighter aircraft safely under the conditions the aircraft was expected to fly. Fly-by-wire has become common on large aircraft (commercial and military). This “driving-by-wire” has crept into the auto industry first with antilock brakes, followed by automatic parking, automatic braking, and crash avoidance systems.<sup>43</sup> As we use these large clinical databases to develop designer anesthetic plans, it will become too difficult for a practitioner to track those plans for individual patients, with specific comorbidities and medications, undergoing procedures. There will need to be a progression from what we have as pop-up alert decision support to complete an integrated primary flight display and multifunctional display support, as in modern aircraft (fig. 8A). If you think this analogy to the aircraft industry is going too far, look at the cover of the August 2010 issue of *Anesthesia & Analgesia*, which shows a display for pharmacokinetic modeling in the cockpit of an F-111 aircraft.<sup>44</sup> The cover description says, “Anesthesiologists are pilots ... navigating the patient through profound physiologic trespass ... coming to a cockpit near you.”<sup>44</sup> Early data suggest types of management that are not clinically feasible. Two years ago, Kheterpal published an article<sup>45</sup> from our institution in which he examined preoperative and intraoperative predictors of postoperative myocardial infarction. One of the findings was that if the median blood pressure measured during 10-min epochs decreased to lower than 60% of the patient’s preoperative baseline measurement, the incidence of postoperative myocardial infarction increased.<sup>45</sup> Calculating the median blood pressure during a 10-min interval continuously in real time during a case and comparing it with 60% of the preoperative blood pressure would be a challenge for even the brightest anesthesiologist. In 2005, Terri Monk, M.D. (Professor, Anesthesiology, Duke Uni-

versity Medical Center, Durham, North Carolina), presented a study reporting the 1-yr mortality related to the area under the curve of bispectral index measurements lower than 45 (cumulative deep hypnotic time).<sup>46</sup> Measuring the real-time area under the curve would also be challenging. Neither of these calculations would be difficult for the decision-support computer in the AIMS. These types of informatics may aid in our anesthetic plan and, more importantly, assist us in selecting the most appropriate postoperative care plan.

During the next decade, as these data provide more specific decision care plans that are automatically derived when the patient’s preoperative comorbidities, medication, procedure, and intraoperative response data are entered, some might suggest that this is the ultimate in “cookbook medicine.” I would say, absolutely! I would suggest that all the best chefs use books, all engineers I know use books, and people who are looking out for the welfare of their patients should also use all the decision support available. Figure 8B is an attempt at an “avionic screen” for the management of an intraoperative patient. We designed this with the help of the Engineering School at the University of Michigan and incorporated many of the aspects of general anesthesia care and teaching, calculated on a real-time basis.<sup>47</sup> The heart and lungs move in real time from the physiologic monitor; the estimated cardiac filling is determined by continuous input and output calculations, unless there is an invasive monitor. It highlights organ systems at risk, alerts you when physiologic data are in marginal or dangerous range, and is programmed to detect immediate events (e.g., malignant hyperthermia and tension pneumothorax). When I have demonstrated this to anesthesiologists, they have said “with this type of support, anyone could provide anesthesia,” and I would say, “with this type of support, anyone could provide *safer* anesthesia.” I have also heard people remark that this type of support is trying to put us out of a job. My response would be that, despite the fact that the Airbus 320 flown in US Airways Flight 506 in New York had electronic decision-support capabilities, I think all of the passengers would agree they were happy to have Captain Chesley B. “Sully” Sullenberger and copilot Jeffrey Skiles at the front of the plane when the birds hit the fan.||||

I would like to acknowledge Jenny Mace (Faculty Staff Associate, Department of Anesthesiology, University of Michigan Health System, Ann Arbor, Michigan) for her extensive assistance in developing this lecture and manuscript, especially for her efforts in finding the historical photos, which I feel added greatly to the presentation.

### References

1. Bigelow HJ: Insensibility during surgical operations produced by inhalation. *Boston Med Surg J* 1846; 35:309–17
2. The Editors of the New England Journal of Medicine: Looking back on the millennium in medicine. *N Engl J Med* 2000; 342:42–9
3. Larsen DJ, Nigro LJ. Selfridge Field. Charleston, Chicago, Portsmouth, and San Francisco, Arcadia Publishing, 2006
4. Knight PR 3rd, Bacon DR: An unexplained death: Hannah Greener and chloroform. *ANESTHESIOLOGY* 2002; 96:1250–3
5. Bennetts FE: Thiopentone anaesthesia at Pearl Harbor. *Br J Anaesth* 1995; 75:366–8

§§ F-8 Digital Fly-by-wire Aircraft [fact sheet]. Dryden Flight Research Center, Edwards, California. NASA Web site. Available at: <http://www.nasa.gov/centers/dryden/news/FactSheets>. Accessed July 29, 2010.

|||| Altman A, Chesley B, Sullenberger III. The US Airways Crash: A Growing Bird Hazard. *Time Magazine*. January 16, 2009. Available at: <http://www.time.com>. Accessed July 19, 2010.

6. Beecher HK, Todd DP: A study of the deaths associated with anesthesia and surgery: Based on a study of 599,548 anesthetics in ten institutions 1948–1952, inclusive. *Ann Surg* 1954; 140:2–35
7. Committee on Quality of Health Care in America, Institute of Medicine: *To Err Is Human: Building a Safer Health System*. Edited by Kohn LT, Corrigan JM, Donaldson MS. Washington, National Academy Press, 2000
8. Molnár C, Nemes C, Szabó S, Fülesdi B: Harvey Cushing, a pioneer of neuroanesthesia. *J Anesth* 2008; 22:483–6
9. Millikan GA: The oximeter, an instrument for measuring continuously the oxygen saturation of arterial blood in man: Physical instruments for the biologist. *Rev Sci Instrum* 1942; 13:434
10. Gullstrand A: Presentation of the Nobel Prize to Robert A. Millikan. *Science* 1924; 59:325–6
11. Stephen CR, Slater HM, Johnson AL, Sekelj P: The oximeter: A technical aid for the anesthesiologist. *ANESTHESIOLOGY* 1951; 12:541–55
12. Severinghaus JW: Takuo Aoyagi: Discovery of pulse oximetry. *Anesth Analg* 2007; 105:S1–4, tables of contents
13. Severinghaus JW, Honda Y: History of blood gas analysis: VII. Pulse oximetry. *J Clin Monit* 1987; 3:135–8
14. Yelderman M, New W Jr: Evaluation of pulse oximetry. *ANESTHESIOLOGY* 1983; 59:349–52
15. Bause GS: W.T.G. Morton's "Letheon" advertisement: Anesthesiology reflections. *ANESTHESIOLOGY* 2009; 110:486
16. Wright O, Wright W, inventors: Flying-Machine. U.S. patent 821 393. May 22, 1906.
17. Bittlingmayer G: Property rights, progress, and the aircraft patent agreement. *J Law Econ* 1988; 31:227–48
18. Pronovost PJ: We need leaders: The 48<sup>th</sup> annual Rovenstine lecture. *ANESTHESIOLOGY* 2010; 112:779–85
19. Hayes AB, Weiser TG, Berry WR, Lipsitz SR, Breizat AHS, Dellinger EP, Herbosa T, Joseph S, Kibatala PL, Lapitan MCM, Merry AF, Moorthy K, Reznick RK, Taylor B, Gawande AA: Safe Surgery Saves Lives Study Group: A surgical safety checklist to reduce morbidity and mortality in a global population. *N Engl J Med* 2009; 360:491–9
20. Philibert I, Friedmann P, Williams WT: ACGME Work Group on Resident Duty Hours, Accreditation Council for Graduate Medical Education: New requirements for resident duty hours. *JAMA* 2002; 288:1112–4
21. Gaba D, Cooper J: Landmark report published on patient safety. *APSF Newsletter J Clin Monit Comput* 2000; 16:231–2
22. Gaba DM, Maxwell M, DeAnda A: Anesthetic mishaps: Breaking the chain of accident evolution. *ANESTHESIOLOGY* 1987; 66:670–6
23. Blum JM, Kheterpal S, Tremper KK: A comparison of anesthesiology resident and faculty electronic evaluations before and after implementation of automated electronic reminders. *J Clin Anesth* 2006; 18:264–7
24. Kheterpal S, Gupta R, Blum JM, Tremper KK, O'Reilly M, Kazanjian PE: Electronic reminders improve procedure documentation compliance and professional fee reimbursement. *Anesth Analg* 2007; 104:592–7
25. Mashour GA, Esaki RK, Vandervest JC, Shanks A, Kheterpal S: A novel electronic algorithm for detecting potentially insufficient anesthesia: Implications for the prevention of intraoperative awareness. *J Clin Monit Comput* 2009; 23:273–7
26. Reich DL, Wood RK Jr, Mattar R, Krol M, Adams DC, Hossain S, Bodian CA: Arterial blood pressure and heart rate discrepancies between handwritten and computerized anesthesia records. *Anesth Analg* 2000; 91:612–6
27. Lerou JG, Dirksen R, van Daele M, Nijhuis GM, Crul JF: Automated charting of physiological variables in anesthesia: A quantitative comparison of automated versus handwritten anesthesia records. *J Clin Monit* 1988; 4:37–47
28. Khuri SF, Daley J, Henderson W, Hur K, Demakis J, Aust JB, Chong V, Fabri PJ, Gibbs JO, Grover F, Hammermeister K, Irvin G 3rd, McDonald G, Passaro E Jr, Phillips L, Scamman F, Spencer J, Stremple JF: The Department of Veterans Affairs' NSQIP: The first national, validated, outcome-based, risk-adjusted, and peer-controlled program for the measurement and enhancement of the quality of surgical care: National VA Surgical Quality Improvement Program. *Ann Surg* 1998; 228:491–507
29. Saklad M, Rovenstine EA, Taylor IB: Grading of patients for surgical procedures. *ANESTHESIOLOGY* 1941; 2:281–4
30. Iglehart JK: Reform of the Veterans Affairs Health Care System: Health policy report. *N Engl J Med* 1996; 335:1407–11
31. Langeron O, Masso E, Huraux C, Guggiari M, Bianchi A, Coriat P, Riou B: Prediction of difficult mask ventilation. *ANESTHESIOLOGY* 2000; 92:1229–36
32. Han R, Tremper KK, Kheterpal S, O'Reilly M: Grading scale for mask ventilation (letter to the editor). *ANESTHESIOLOGY* 2004; 101:267
33. Kheterpal S, Han R, Tremper KK, Shanks A, Tait AR, O'Reilly M, Ludwig TA: Incidence and predictors of difficult and impossible mask ventilation. *ANESTHESIOLOGY* 2006; 105:885–91
34. Kheterpal S, Martin L, Shanks AM, Tremper KK: Prediction and outcomes of impossible mask ventilation: A review of 50,000 anesthetics. *ANESTHESIOLOGY* 2009; 110:891–7
35. Solomon SD, McMurray JJ, Pfeffer MA, Wittes J, Fowler R, Finn P, Anderson WF, Zauber A, Hawk E, Bertagnolli M; Adenoma Prevention with Celecoxib (APC) Study Investigators: Cardiovascular risk associated with celecoxib in a clinical trial for colorectal adenoma prevention. *N Engl J Med* 2005; 352:1071–80
36. Mangano DT, Tudor IC, Dietzel C; Multicenter Study of Perioperative Ischemia Research Group, Ischemia Research and Education Foundation: The risk associated with aprotinin in cardiac surgery. *N Engl J Med* 2006; 354:353–65
37. Karkouti K, Beattie WS, Dattilo KM, McCluskey SA, Ghannam M, Hamdy A, Wijeyesundera DN, Fedorko L, Yau TM: A propensity score case-control comparison of aprotinin and tranexamic acid in high-transfusion-risk cardiac surgery. *Transfusion* 2006; 46:327–38
38. Fergusson DM, Hébert PC, Mazer CD, Fremes S, MacAdams C, Murkin JA, Teoh K, Duke PC, Arellano R, Blajchman MA, Bussières JS, Côté D, Karski J, Martineau R, Robblee JA, Rodger M, Wells G, Clinch J, Pretorius R; BART Investigators: A comparison of aprotinin and lysine analogues in high-risk cardiac surgery. *N Engl J Med* 2008; 358:2319–31
39. Vlahakes GJ: The value of phase 4 clinical testing. *N Engl J Med* 2006; 354:413–5
40. Murray JC, Buetow KH, Weber JL, Ludwigsen S, Scherpbier-Heddema T, Manion F, Quillen J, Sheffield VC, Sunden S, Duyk GM: A comprehensive human linkage map with centimorgan density: Cooperative Human Linkage Center (CHLC). *Science* 1994; 265:2049–54
41. Rovenstine EA: A method of combining anesthetic and surgical records for statistical purposes. *Anesth Analg* 1934; 13:122–8
42. Brière D, Traverse P: Airbus A320/A330/A340 electrical flight controls a family of fault-tolerant systems. *Proc FTCS* 1993; 616–23
43. Advance parking guidance system: 2007 Lexus LS 460 road test [special feature]. *Motor Week* 2007; 4–9
44. Visualizing pharmacokinetics. *Anesth Analg* 2010; 111:Cover Page
45. Kheterpal S, O'Reilly M, Englesbe MJ, Rosenberg AL, Shanks A, Zhang L, Rothman ED, Campbell DA, Tremper KK: Preoperative and intraoperative predictors of cardiac adverse events after general, vascular, and urological surgery. *ANESTHESIOLOGY* 2009; 110:58–66
46. Monk TG, Saini V, Weldon BC, Sigl JC: Anesthetic management and one-year mortality after noncardiac surgery. *Anesth Analg* 2005; 100:4–10
47. Chen C, Kruger GH, Blum JM, Shih AJ, Tremper KK: Reactive agent and visualization system for anesthesia support in the operating room. In *Proceedings of the International Conference on Engineering and Meta-Engineering (ICEME 2010)*, Orlando, Florida, April 6–9, 2010
